# Supplementary material for: Response of Land Surface Temperature to Heatwave-Induced Bio-Geophysical Changes in Tropical Forests on Hainan Island from 2010 to 2022
Source: MDPI journal article supplement (doi:10.3390/w16050752), 2024-03-01
Supplement: s1 [file s1]

In this study, the vorticity flux system at the DZ observatory has been making near-surface flux observations since November 2009, covering a range from 1 m below ground to 50 m above the top of the observation tower. Table S1 shows the detailed measuring tools and their installation.

**Table S1.** Installation of measurement instruments of eddy flux observation system at DZ Experimental Station of Tropical Crop Science Observation, Ministry of Agriculture, DZ City, Hainan Province.

| <b>Data type</b>                       | <b>Measuring instrument</b>                                                                                                                                 | <b>Installation position</b> |
|----------------------------------------|-------------------------------------------------------------------------------------------------------------------------------------------------------------|------------------------------|
| Wind speed                             | Three-cup anemometer<br>(Met 010C-1, Met One, Inc., USA)                                                                                                    | 1.5、6、10、15、<br>33、41、50m    |
| Temperature and humidity               | Hygrometer<br>(HMP45C; Inc., Vaisala, Finland)                                                                                                              | 1.5、6、10、15、<br>33、41、50m    |
| Wind direction                         | Anemometer<br>(Met 020C-1, Met One, USA)                                                                                                                    | 50m                          |
| Quantity of rainfall                   | Rain barrel (TE525MM, texas<br>instruments, USA)                                                                                                            | 50m                          |
| Radiation                              | Radiation Observation Sensor<br>(CNR-1, Kipp&Zonen, Inc.,<br>Holland)                                                                                       | 25m                          |
| Canopy and surface<br>temperature      | Radiation observation sensor<br>(CNR-1, Apogee, Inc., USA)                                                                                                  | 1.5、30m                      |
| Soil temperature                       | Soil Temperature Observer<br>(109, Campbell Scientific Inc.,<br>Logan, UT, USA)                                                                             | 2、5、20、<br>50、100cm          |
| Soil moisture                          | Soil Moisture Sensor<br>(CS616-L, Campbell Scientific Inc.,<br>Logan, UT, USA)                                                                              | 5、20、50cm                    |
| Soil heat flux                         | Soil Heat Flux Plate<br>(HFP01. Hukseflux, Inc., Holland)                                                                                                   | 5、20、50cm                    |
| CO <sub>2</sub> and water vapor fluxes | Open-circuit infrared CO <sub>2</sub> /H <sub>2</sub> O gas<br>analyzer (LI-7500 Li-cor Inc. H <sub>2</sub> O<br>gas analyzer, LI-7500, LiCor Inc.,<br>USA) | 25m                          |
| Latent and sensible heat<br>fluxes     | Three-dimensional ultrasonic<br>anemometer (CSAT3, Campbell<br>Scientific Inc., Logan, UT, USA)                                                             | 25m                          |
